# Supplementary material
Source: PubMed Central journal article supplement (PMC6112703)
Supplement: pnas.1801609115.sapp.pdf [file pnas.1801609115.sapp.pdf]

### Supplementary Tables and legends

|                                             | <b>HC (n=45)<br/>Mean (SD)</b> | <b>MDD (n=71)<br/>Mean (SD)</b> |
|---------------------------------------------|--------------------------------|---------------------------------|
| <b>Age</b>                                  | 38.1 (9.9)                     | 40.8 (13.3)                     |
| <b>Height (cm)</b>                          | 170 (11.4)                     | 170 (10.9)                      |
| <b>Weight (Kg)</b>                          | 77.5 (18.1)                    | 78 (18.4)                       |
| <b>BMI</b>                                  | 26.7 (4.8)                     | 27 (5.6)                        |
| <b>Sex</b>                                  | 51% (M)                        | 49% (M)                         |
| <b>MADRS</b>                                | 1.4 (2.4)                      | 32.9 (4.7) <sup>***</sup>       |
| <b>HAM-17</b>                               | 0.6 (1.1)                      | 20.2 (3.3) <sup>***</sup>       |
| <b>Age of Onset</b>                         | -                              | 22.1 (12.5)                     |
| <b>Length of Current Depressive Episode</b> | -                              | 21.3 (21.3)                     |
| <b>Number of Past Depressive Episodes</b>   |                                |                                 |
| 1                                           | -                              | 22.5%                           |
| 2                                           | -                              | 9.9%                            |
| ≥3                                          | -                              | 67.6%                           |
| <b>Psychiatric Comorbidities</b>            | -                              | 42.3%                           |
| <b>Psychotropic Medications</b>             | -                              | 25.4%                           |
| Antidepressants                             | -                              | 18.3%                           |
| Other psychotropic meds                     | -                              | 18.3%                           |
| <b>Acetyl-L-carnitine (LAC)</b>             | 8.3 (3.4)                      | 6.1 (2.1) <sup>***</sup>        |
| <b>Free-carnitine</b>                       | 33 (9.2)                       | 32 (9.7)                        |

**Table SI 1. Demographic and clinical characteristics for the 116 subjects.** Sex is reported as % of men.

\*indicates significant comparisons with HC. \*\*\* $p < 0.001$  at Student's two-tailed t-tests and chi-square as appropriate ( $\alpha = 0.05$ ). Psychiatric comorbidities included anxiety disorders as for DSM-IV, such as Post-Traumatic Stress Disorders (PTSD), Generalized Anxiety Disorder (GAD) and panic disorder. Other psychotropic medications included antipsychotics, mood stabilizers, benzodiazepines, and estrogen and thyroid hormone modulators.

|                                                      | Center                 |                         |                        |                         |
|------------------------------------------------------|------------------------|-------------------------|------------------------|-------------------------|
|                                                      | C                      |                         | S                      |                         |
|                                                      | HC (n=26)<br>Mean (SD) | MDD (n=37)<br>Mean (SD) | HC (n=19)<br>Mean (SD) | MDD (n=34)<br>Mean (SD) |
| <b>Age</b>                                           | 38.5 (10)              | 42.7 (13.7)             | 37.7 (9.9)             | 38.6 (12.7)             |
| <b>Height (cm)</b>                                   | 170.6 (11.6)           | 171.8 (11.3)            | 168.9 (11.3)           | 168 (10.4)              |
| <b>Weight (Kg)</b>                                   | 78.5 (18.4)            | 80 (19.4)               | 76.3 (18.1)            | 76.2 (17.3)             |
| <b>BMI</b>                                           | 26.7 (4.7)             | 26.8 (5.4)              | 26.6 (5.1)             | 27.2 (5.9)              |
| <b>Sex</b>                                           | 54% (M)                | 49% (M)                 | 47% (M)                | 50% (M)                 |
| <b>MADRS</b>                                         | -                      | -                       | 1.4 (2.4)              | 32.9 (4.7)              |
| <b>HAM-17</b>                                        | 0.6 (1.1)              | 20.4 (3.4)              | -                      | 19.7 (3.1)              |
| <b>Age of Onset</b>                                  | -                      | 25.3 (13.7)             | -                      | 18.4 (10)               |
| <b>Length of Current Depressive Episode (months)</b> | -                      | 15.3 (16.5)             | -                      | 27 (24)                 |
| <b>Number of Past Depressive Episodes</b>            |                        |                         |                        |                         |
| 1                                                    | -                      | 16.2%                   | -                      | 29.4%                   |
| 2                                                    | -                      | 8.1%                    | -                      | 11.8%                   |
| ≥3                                                   | -                      | 75.7%                   | -                      | 58.8%                   |
| <b>Psychiatric Comorbidities</b>                     | -                      | 62.2%                   | -                      | 20.6%                   |
| <b>Psychotropic Medications</b>                      | -                      | 21.6%                   | -                      | 29.4%                   |
| Antidepressants                                      | -                      | 21.6%                   | -                      | 14.7%                   |
| Other psychotropic meds                              | -                      | 8.1%                    | -                      | 29.4%                   |
| <b>Acetyl-L-carnitine (LAC)</b>                      | 8.4 (3.5)              | 6.1 (2.2)               | 8.3 (3.4)              | 6.1 (2)                 |
| <b>Free-carnitine</b>                                | 34.8 (9.2)             | 32 (10.5)               | 30.6 (8.9)             | 31.2 (8.9)              |

**Table SI 2. Demographic and clinical characteristics by study center, showing similarities across patient samples at both recruitment sites (C: Weill Cornell School of Medicine; S: Mount Sinai School of Medicine). Sex is reported as % of men.**

\*indicates significant comparisons with HC. \*\*\*p<0.001 at Student's two-tailed t-tests and chi-square as appropriate ( $\alpha=0.05$ ).

Psychiatric comorbidities included anxiety disorders as for DSM-IV, such as Post-Traumatic Stress Disorders (PTSD), Generalized Anxiety Disorder (GAD) and panic disorder. Other psychotropic medications included antipsychotics, mood stabilizers, benzodiazepines, and estrogen and thyroid hormone modulators.

Supplementary figures and legends

LAC measures by ESI-MS/MS

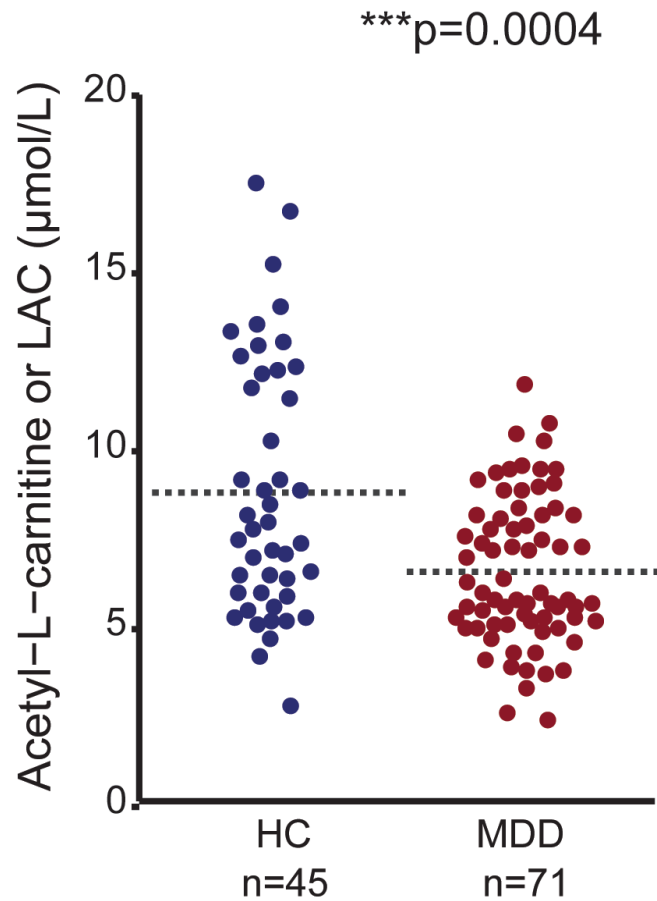

**Fig.SI1. LAC measures by stable isotope dilution electrospray-tandem mass spectrometry (ESI-MS/MS).** Plasma LAC measurements by ESI-MS/MS in the same 116 samples showing a methodological validation of reduced LAC in patients with MDD as compared to age- and sex-matched healthy controls (HC). \*indicates significant comparisons with HC. Dashed bars indicate group mean.

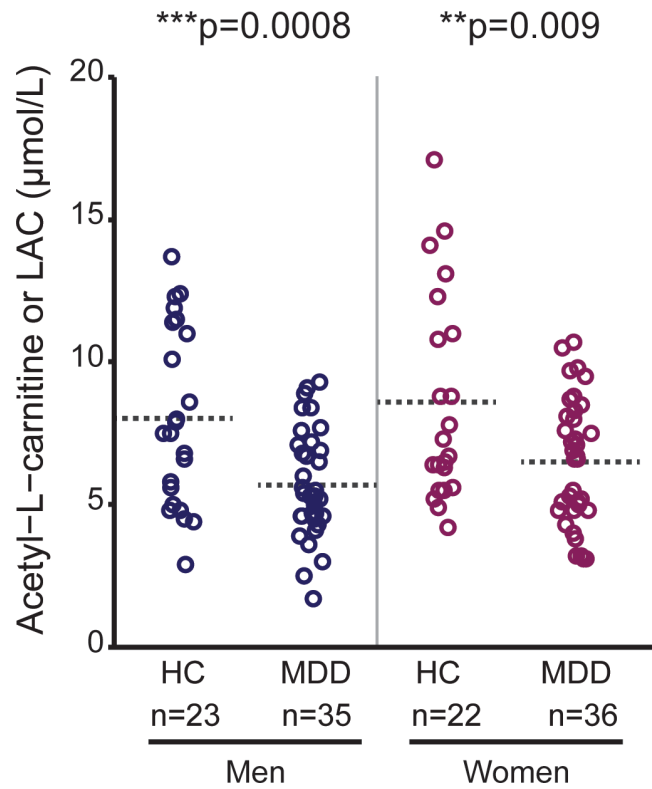

**Fig.SI2. LAC levels differ between HC and MDD groups in both men and women.** Plasma LAC levels in HC and MDD subjects (men in blue; women in pink) as assessed by UPLC-MS/MS. \*indicates significant comparisons with HC. \*\*\* $p < 0.001$  at Student's two-tailed t-tests ( $\alpha = 0.05$ ). Dashed bars indicate group mean.

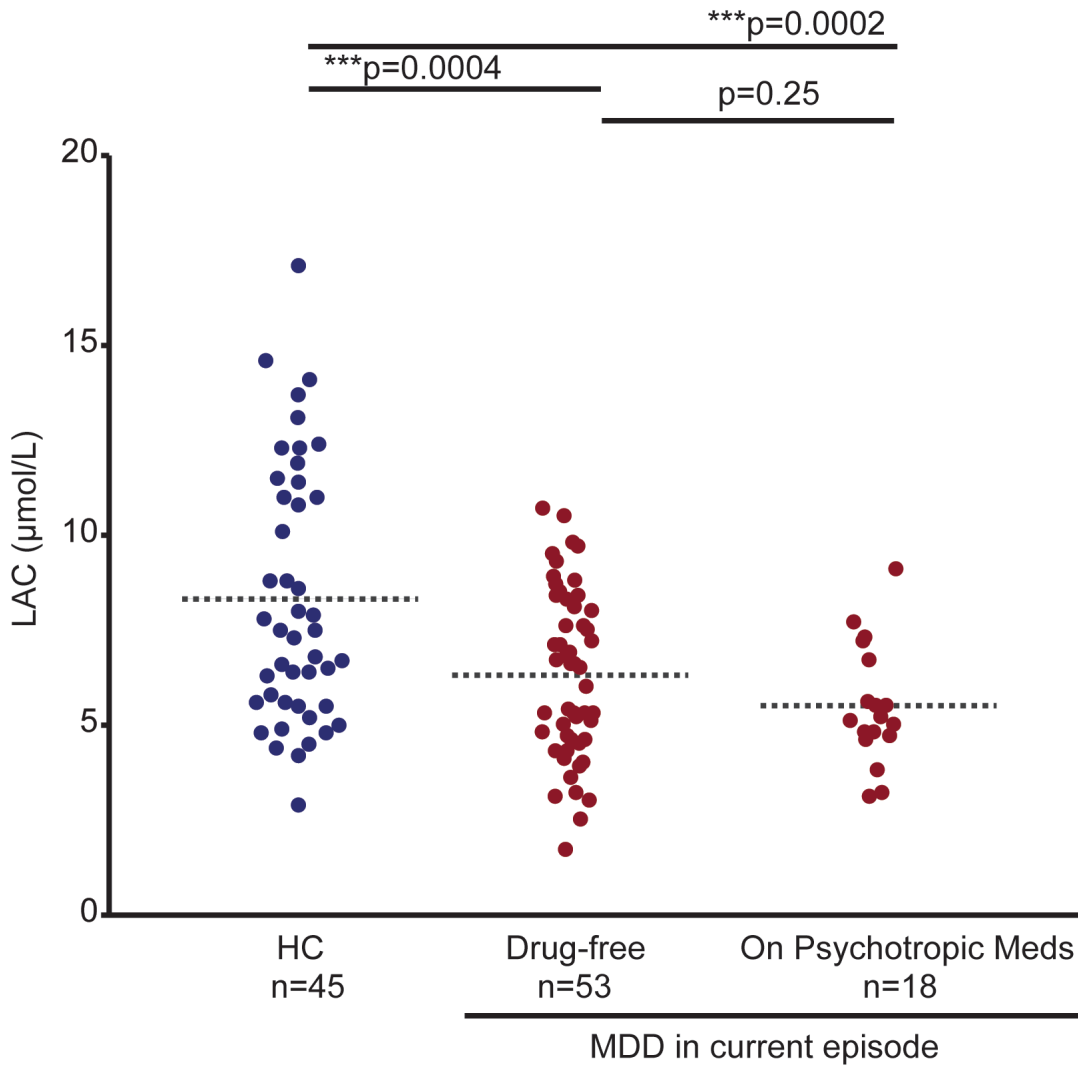

**Fig.SI3. The association between LAC and MDD persists upon use of psychotropic medications.**

Plasma LAC concentrations in HC and in patients with MDD, in an acute depressive episode during study participation, broken down by use of psychotropic medications (patients not-receiving treatment at the time of study participation: 53; patients with MDD on psychotropic medications: 18). All patients were in acute depressive episode at the time of study participation. \*\*\* $p < 0.001$  at Student's two-tailed t-tests ( $\alpha = 0.05$ ). Dashed bars indicate group mean.

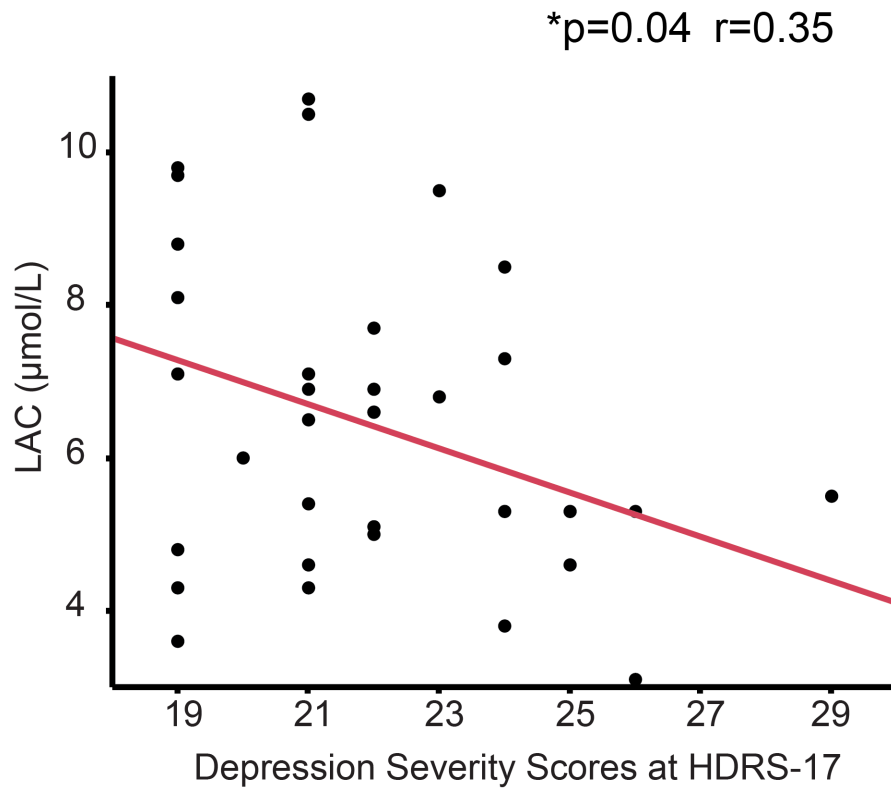

**Fig.S14. LAC is lower in patients who exhibit greater severity.** Pearson correlation between LAC concentrations and depression severity scores at HDRS-17 among patients with moderate to severe depression (cutoff  $\geq 19$  at HDRS-17). \* $p < 0.05$  using Pearson correlation ( $\alpha = 0.05$ ). Regression line is indicated in red.

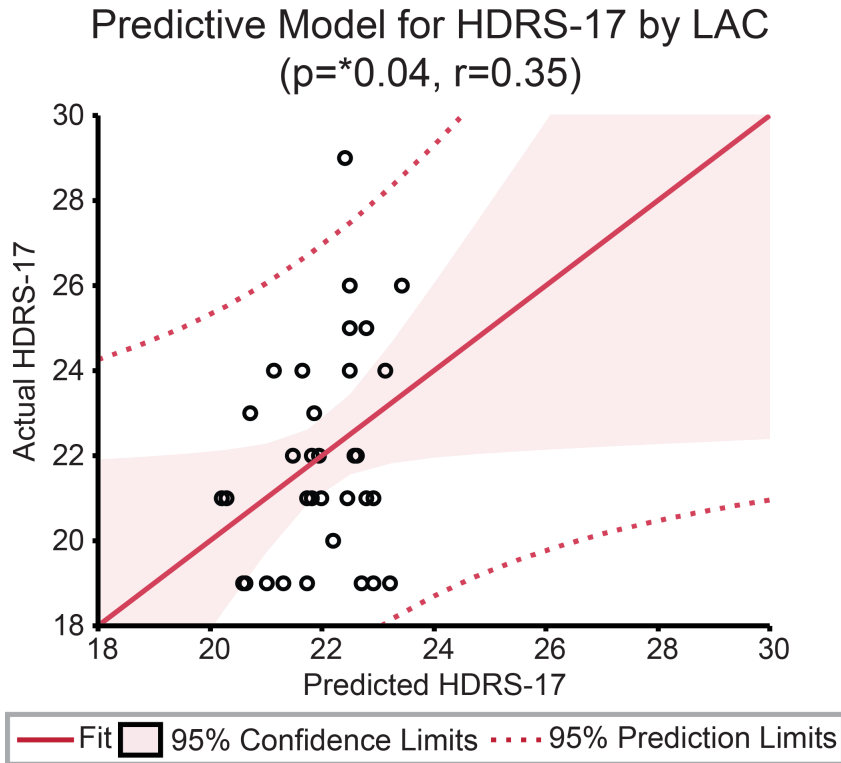

**Fig.SI5. LAC levels predict MDD severity scores at HDRS-17.** Prediction model analysis of depression severity scores at HDRS-17 by LAC in patients with moderate to severe MDD. In x-axis: depression severity scores at HDRS-17 as predicted by the model; in y-axis: depression severity scores at HDRS-17 self-reported by patients. \* $p<0.05$  using multiple regression analysis.



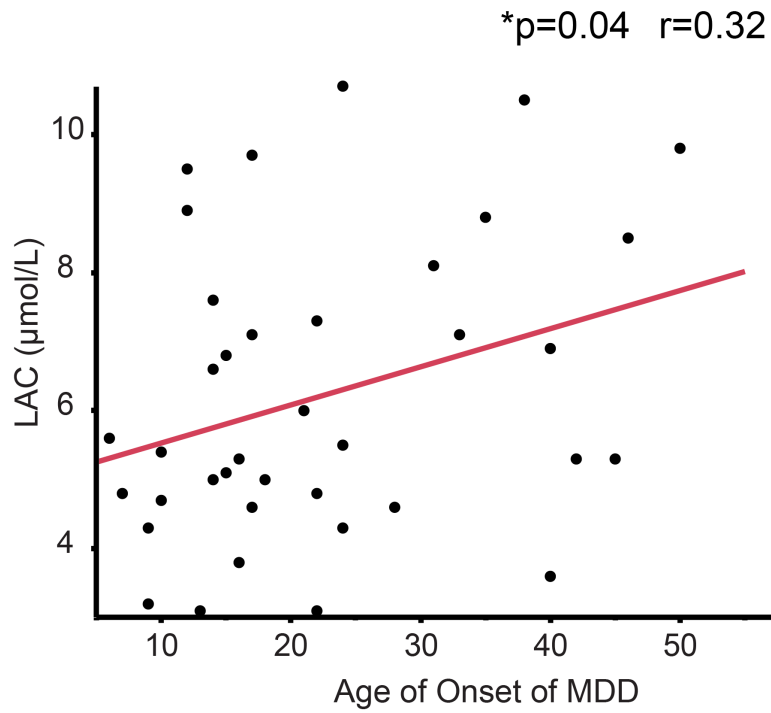

**Fig.S16. LAC is lower in patients who report earlier onset of the illness.** Pearson correlation between LAC levels and age of onset of MDD among patients with moderate to severe depression (cutoff  $\geq 19$  at HDRS-17, ref ). \* $p < 0.05$  using Pearson correlation ( $\alpha = 0.05$ ). Regression line is indicated in red.

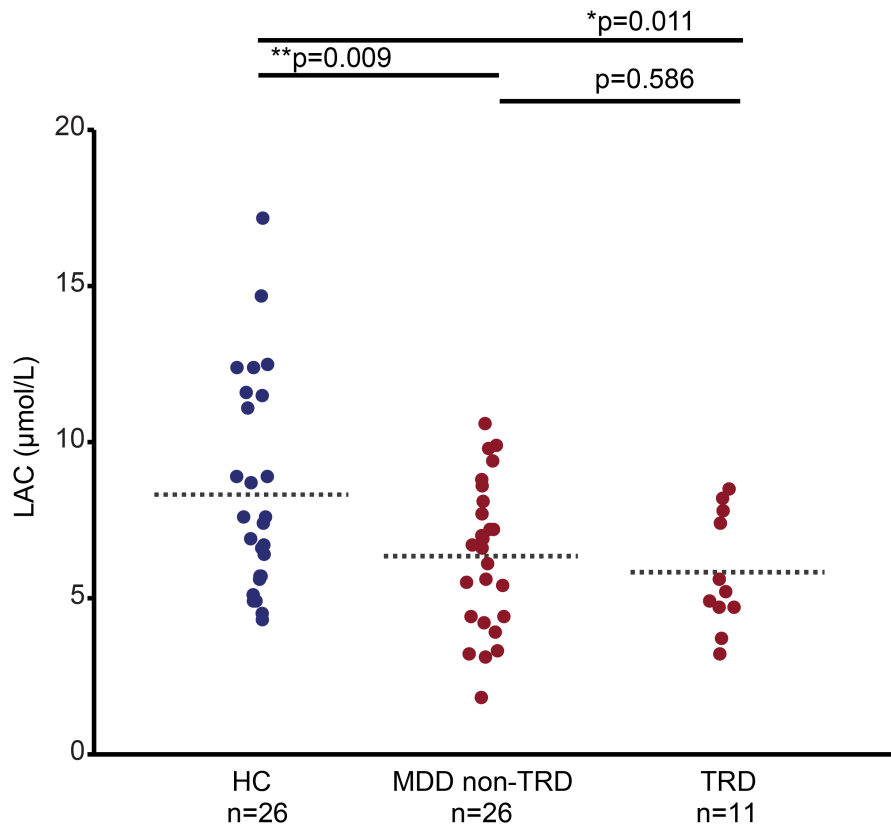

**Fig.S17. The LAC deficiency is greater in patients with MDD and history of treatment-resistant depression (TRD).** Plasma LAC concentrations across HC and patients with MDD with or without history of TRD, labeled as MDD non-TRD and TRD for the study center C.  $F_{2,62}=5.1$ ,  $p=0.009$ . \*indicates significant comparisons with HC at Student's two-tailed t-tests ( $\alpha=0.05$ ). Dashed bars indicate group mean. See also Fig.3 for stepwise analysis in study center S.

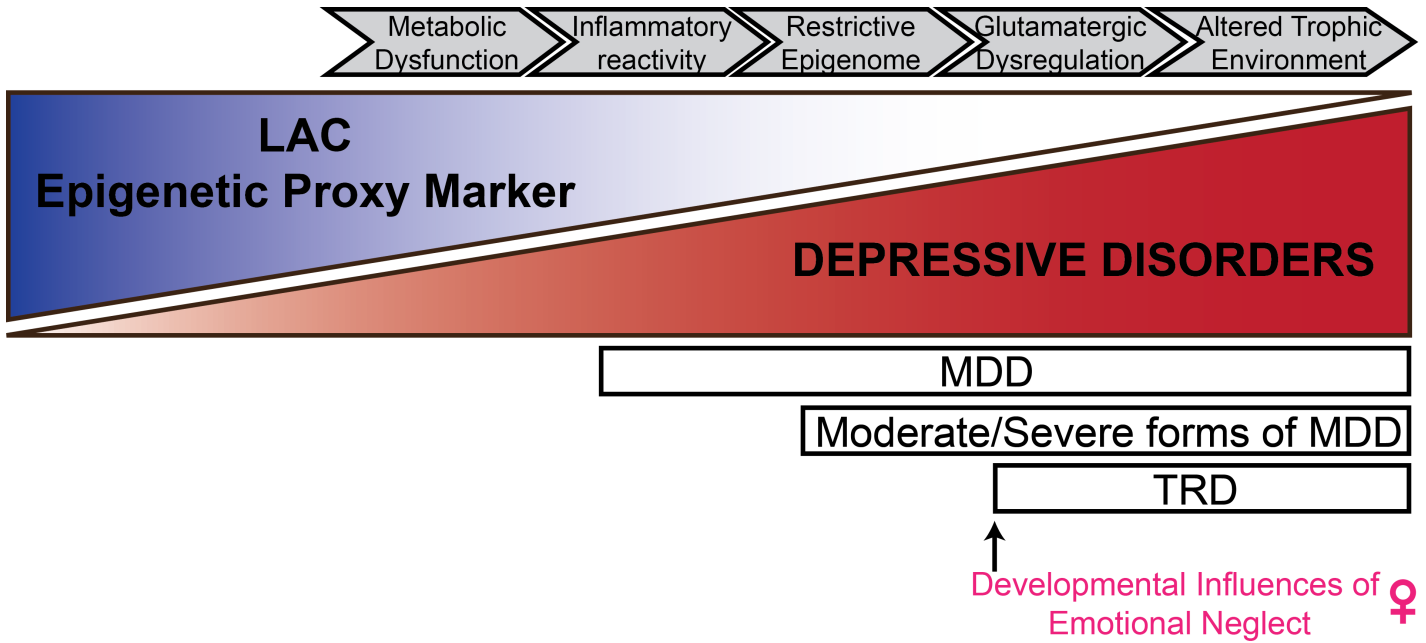

**Fig.S18. Model featuring the Epigenetic Agent LAC as a candidate biomarker to help the diagnosis of a clinical endophenotype of MDD.** Schematic illustration of a proposed model featuring a kindling-like reduction in LAC toward more severe forms of MDD. The LAC deficiency may represent a proxy target that integrates interdependent biological functions underlying a vicious cycle of metabolic dysfunction, inflammatory reactivity, glutamatergic dysregulation and altered trophic environment in the pathophysiology of MDD. We propose that LAC may serve as a candidate biomarker to help the diagnosis of a bio-behavioral phenotype of MDD characterized by reduced LAC, greater severity and earlier onset as well as a history of childhood trauma in patients with TRD. Together with studies in rodents, these first translational findings demand further exploration of LAC as a therapeutic target that may help to define individualized treatments in biologically-based depression subtype consistent with the spirit of precision medicine.
